# Supplementary material for: Distinguishing Incubation and Acute Disease Stages of Mild-to-Moderate COVID-19
Source: MDPI journal article supplement (doi:10.3390/v14020203), 2022-01-20
Supplement: s1 [file s1]

# Supplementary Material for

## Distinguishing Incubation and Acute Disease Stages of Mild-to-Moderate COVID-19

Michael Müller, Johann Volzke *et al.*

Corresponding author. Email: Brigitte Müller-Hilke, [brigitte.mueller-hilke@med.uni-rostock.de](mailto:brigitte.mueller-hilke@med.uni-rostock.de)

**The file includes:**

Figure S1

Tables S1 to S17

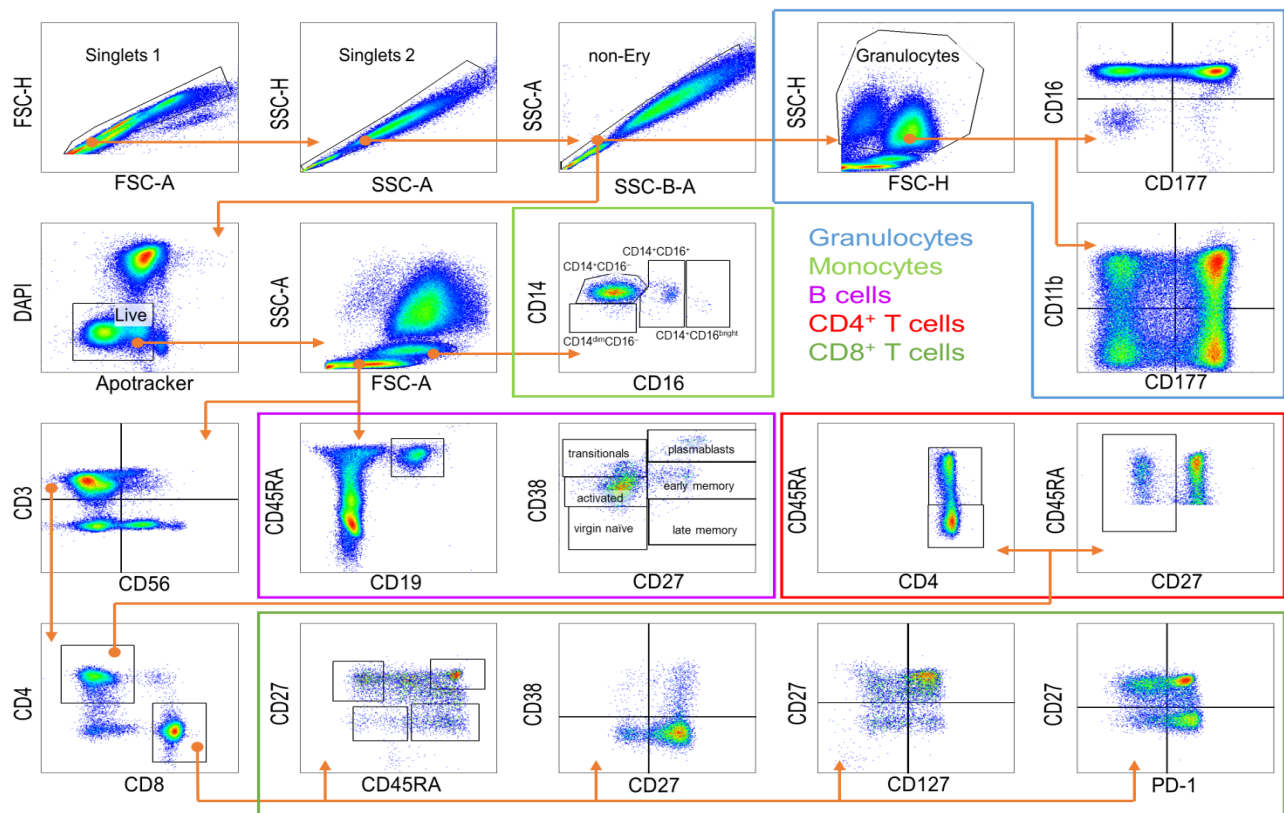

**Table S1.** CD14<sup>+</sup> Multi-Pathway Signaling.

|                | Controls (n = 12)  | COVID-19 (n = 11)  | MWW           |                   | Controls (n = 12)        | COVID-19 (n = 11)        | MWW     |
|----------------|--------------------|--------------------|---------------|-------------------|--------------------------|--------------------------|---------|
| Protein [1/μg] | Median (IQR)       | Median (IQR)       | p-value       | p-Protein/Protein | Median (IQR)             | Median (IQR)             | p-value |
| CREB           | 35.8 (26.0 – 53.6) | 8.0 (3.87 – 36.3)  | 0.0792        | p-CREB/CREB       | 0.0013 (0.0006 – 0.0108) | 0.0108 (0.0019 – 0.0340) | 0.212   |
| JNK            | 15.0 (12.5 – 23.3) | 10.0 (6.89 – 13.6) | 0.051         | p-JNK/JNK         | 0.0294 (0.0113 – 0.0621) | 0.0483 (0.0259 – 0.0670) | 0.566   |
| NF-κB          | 0.10 (0.10 – 0.20) | 0.09 (0.06 – 0.15) | 0.288         | p-NF-κB/NF-κB     | 1.9189 (0.0412 – 7.6768) | 2.4977 (1.7329 – 5.5697) | 0.695   |
| p38            | 3.74 (3.32 – 10.9) | 2.21 (1.47 – 12.2) | 0.091         | p-p38/p38         | 0.0193 (0.0075 – 0.0730) | 0.1469 (0.0696 – 0.1703) | 0.060   |
| ERK1/2         | 0.18 (0.14 – 0.21) | 0.14 (0.08 – 0.20) | 0.260         | p-ERK1/2/ERK1/2   | 0.0145 (0.0008 – 0.1724) | 0.1881 (0.0683 – 0.2638) | 0.151   |
| Akt            | 13.8 (11.2 – 16.3) | 8.57 (5.90 – 16.3) | 0.260         | p-Akt/Akt         | 0.0107 (0.0048 – 0.0166) | 0.0099 (0.0071 – 0.0113) | 0.786   |
| p70S6k         | 27.1 (20.7 – 29.3) | 9.97 (5.72 – 15.6) | <b>0.0036</b> | p-p70S6K/p70S6k   | 0.3323 (0.1159 – 0.5749) | 0.4024 (0.1059 – 0.7781) | 0.786   |
| STAT3          | 157 (112 – 240)    | 58.9 (33.8 – 137)  | <b>0.023</b>  | p-STAT3/STAT3     | 0.0429 (0.0217 – 0.1226) | 0.1209 (0.0274 – 0.5245) | 0.316   |
| STAT5          | 33.2 (28.4 – 51.7) | 27.4 (15.5 – 54.5) | 0.449         | p-STAT5/STAT5     | 0.0444 (0.0107 – 0.0580) | 0.0357 (0.0092 – 0.0882) | 0.740   |

MWW: Mann-Whitney-Wilcoxon test.

**Table S2.** CD3<sup>+</sup> Multi-Pathway Signaling.

|                | Controls (n =10)      | COVID-19 (n = 14)  | MWW          |                   | Controls (n = 10)     | COVID-19 (n = 14)     | MWW          |
|----------------|-----------------------|--------------------|--------------|-------------------|-----------------------|-----------------------|--------------|
| Protein [1/μg] | Median (IQR)          | Median (IQR)       | p-value      | p-Protein/Protein | Median (IQR)          | Median (IQR)          | p-value      |
| CREB           | 210 (131 – 347)       | 242 (61.4 – 412)   | 0.977        | p-CREB/CREB       | 1.576 (0.738 – 4.597) | 1.428 (0.023 – 29.87) | 0.886        |
| JNK            | 396 (321 – 609)       | 332 (174 – 528)    | 0.667        | p-JNK/JNK         | 0.098 (0.036 – 0.353) | 0.130 (0.043 – 0.174) | 0.886        |
| NF-κB          | 95.2 (63.8 – 110)     | 44.7 (1.13 – 108)  | 0.341        | p-NF-κB/NF-κB     | 3.024 (0.352 – 20.42) | 4.258 (3.591 – 6.356) | 0.886        |
| p38            | 144 (120 – 180)       | 146 (47.4 – 183)   | 0.796        | p-p38/p38         | 0.983 (0.322 – 8.661) | 0.850 (0.207 – 3.785) | 0.508        |
| ERK1/2         | 136 (95.8 – 182)      | 85.4 (1.93 – 156)  | 0.235        | p-ERK1/2/ERK1/2   | 0.034 (0.002 – 0.283) | 0.125 (0.074 – 0.354) | 0.437        |
| Akt            | 5461 (2263 – 10271)   | 697 (33 – 6049)    | 0.096        | p-Akt/Akt         | 0.611 (0.092 – 3.065) | 0.023 (0.008 – 0.149) | <b>0.036</b> |
| p70S6k         | 202 (150 – 257)       | 183 (101 – 257)    | 0.709        | p-p70S6K/p70S6k   | 0.251 (0.105 – 0.566) | 0.350 (0.096 – 0.648) | 0.752        |
| STAT3          | 42640 (17715 – 62047) | 3656 (690 – 26623) | <b>0.013</b> | p-STAT3/STAT3     | 0.024 (0.004 – 0.110) | 0.107 (0.041 – 0.340) | 0.138        |
| STAT5          | 7070 (4494 – 10922)   | 630 (106 – 3715)   | <b>0.011</b> | p-STAT5/STAT5     | 0.044 (0.009 – 0.056) | 0.077 (0.016 – 0.206) | 0.172        |

**Table S3.** CD19<sup>+</sup> Multi-Pathway Signaling.

|                | Controls (n = 12)  | COVID-19 (n = 11)  | MWW     |                   | Controls (n = 12)        | COVID-19 (n = 11)        | MWW     |
|----------------|--------------------|--------------------|---------|-------------------|--------------------------|--------------------------|---------|
| Protein [1/μg] | Median (IQR)       | Median (IQR)       | p-value | p-Protein/Protein | Median (IQR)             | Median (IQR)             | p-value |
| CREB           | 309 (144 – 576)    | 216 (6.30 – 642)   | 0.950   | p-CREB/CREB       | 0.0615 (0.0228 – 1.6268) | 0.0647 (0.0038 – 10.281) | 0.950   |
| JNK            | 120 (66.6 – 273)   | 59.3 (19.7 – 158)  | 0.345   | p-JNK/JNK         | 0.0519 (0.0221 – 0.1445) | 0.0231 (0.0041 – 0.1370) | 0.414   |
| NF-κB          | 9.51 (1.02 – 64.2) | 22.2 (0.31 – 56.0) | 0.662   | p-NF-κB/NF-κB     | 2.1005 (1.3766 – 2.8504) | 1.4228 (0.0477 – 3.4136) | 0.950   |
| p38            | 117 (56 – 174)     | 43.7 (7.04 – 149)  | 0.491   | p-p38/p38         | 0.2374 (0.0764 – 2.7023) | 0.0956 (0.0159 – 2.2763) | 0.573   |
| ERK1/2         | 25.7 (1.19 – 162)  | 20.8 (0.20 – 68.4) | 0.345   | p-ERK1/2/ERK1/2   | 0.0982 (0.0342 – 0.2211) | 0.0635 (0.0019 – 0.1417) | 0.491   |
| Akt            | 44.7 (32.6 – 103)  | 57.7 (24.9 – 67.5) | 0.950   | p-Akt/Akt         | 0.0159 (0.0090 – 0.0342) | 0.0096 (0.0024 – 0.0150) | 0.282   |
| p70S6k         | 73.1 (62.1 – 92.5) | 69.1 (25.1 – 123)  | 0.852   | p-p70S6K/p70S6k   | 0.2391 (0.1140 – 0.7140) | 0.4369 (0.0945 – 1.0544) | 1.00    |
| STAT3          | 437 (169 – 1249)   | 154 (32.5 – 653)   | 0.282   | p-STAT3/STAT3     | 0.0551 (0.0431 – 0.3685) | 0.0305 (0.0052 – 0.1297) | 0.414   |
| STAT5          | 124 (19.6 – 281)   | 46.8 (22.4 – 109)  | 0.414   | p-STAT5/STAT5     | 0.0449 (0.0370 – 0.0745) | 0.0148 (0.0035 – 0.0278) | 0.059   |

**Table S4.** CD11b<sup>+</sup> Multi-Pathway Signaling.

|                | Controls (n = 11)  | COVID-19 (n = 9)   | MWW     |                   | Controls (n = 11)                      | COVID-19 (n = 9)         | MWW     |
|----------------|--------------------|--------------------|---------|-------------------|----------------------------------------|--------------------------|---------|
| Protein [1/μg] | Median (IQR)       | Median (IQR)       | p-value | p-Protein/Protein | Median (IQR)                           | Median (IQR)             | p-value |
| CREB           | 1.40 (1.31 – 2.24) | 2.28 (0.69 – 2.87) | 0.766   | p-CREB/CREB       | 0.0005 (0.0003 – 0.0114)               | 0.0009 (0.0001 – 0.0345) | 0.456   |
| JNK            | 12.8 (11.9 – 24.7) | 14.2 (7.40 – 21.2) | 0.552   | p-JNK/JNK         | 0.0058 (0.0021 – 0.0362)               | 0.0475 (0.0210 – 0.0494) | 0.112   |
| NF-κB          | 0.33 (0.29 – 0.47) | 0.22 (0.14 – 0.56) | 0.456   | p-NF-κB/NF-κB     | 0.0746 (0.0106 – 2.2910)               | 2.0574 (0.0322 – 4.547)  | 0.331   |
| p38            | 2.76 (1.96 – 6.34) | 3.52 (1.09 – 6.75) | 0.552   | p-p38/p38         | 0.0138 (0.0033 – 0.0930)               | 0.0737 (0.0069 – 0.1237) | 0.370   |
| ERK1/2         | 0.11 (0.07 – 0.25) | 0.13 (0.04 – 0.20) | 0.412   | p-ERK1/2/ERK1/2   | 0.0022 (0.0002 – 0.1471)               | 0.0793 (0.0007 – 0.1605) | 0.552   |
| Akt            | 13.1 (10.5 – 26.0) | 18.0 (5.71 – 25.9) | 0.603   | p-Akt/Akt         | 0.0050 (2.1×10 <sup>-5</sup> – 0.0077) | 0.0051 (0.0038 – 0.0099) | 0.456   |
| p70S6k         | 4.74 (2.89 – 12.4) | 4.66 (1.37 – 14.9) | 0.656   | p-p70S6K/p70S6k   | 0.0789 (0.0312 – 0.3158)               | 0.1912 (0.0826 – 0.2617) | 0.503   |
| STAT3          | 9.89 (6.71 – 22.9) | 18.3 (4.65 – 26.5) | 0.824   | p-STAT3/STAT3     | 0.0143 (0.0002 – 0.0855)               | 0.0821 (0.0343 – 0.3226) | 0.261   |
| STAT5          | 11.8 (11.4 – 22.2) | 18.9 (6.84 – 19.5) | 0.456   | p-STAT5/STAT5     | 0.0050 (0.0005 – 0.0291)               | 0.0125 (0.0071 – 0.0361) | 0.370   |

**Table S5.** Percentages of B cell Subpopulations.

|                                                                         | healthy controls (n=19) | incubation phase (n=7) | early acute infection (n=11) | late acute infection (n=15) | ANOVA           | ANCOVA          |
|-------------------------------------------------------------------------|-------------------------|------------------------|------------------------------|-----------------------------|-----------------|-----------------|
| among gated<br>CD19 <sup>+</sup> CD45RA <sup>+</sup><br>lymphocytes [%] | mean ± SEM              | mean ± SEM             | mean ± SEM                   | mean ± SEM                  | p-value         | p-value         |
| age                                                                     | 60.00 ± 4.9             | 61.00 ± 6.5            | 64.73 ± 4.1                  | 41.43 ± 4.6                 | 0.01            | –               |
| activated naive                                                         | 47.95 ± 3.8             | 56.56 ± 2.1            | 48.63 ± 6.9                  | 45.97 ± 3.7                 | 0.571           | 0.561           |
| early memory                                                            | 11.26 ± 1.3             | 8.25 ± 1.2             | 6.76 ± 0.8                   | 12.82 ± 1.1                 | <b>6.50E-03</b> | <b>0.035</b>    |
| late memory                                                             | 17.63 ± 2.4             | 10.70 ± 1.4            | 10.07 ± 2.3                  | 13.60 ± 1.9                 | 0.085           | 0.09            |
| plasmablasts                                                            | 1.10 ± 0.2              | 2.88 ± 0.8             | 11.47 ± 2.6                  | 4.43 ± 1.1                  | <b>6.00E-06</b> | <b>5.00E-06</b> |
| transitionals                                                           | 7.07 ± 0.9              | 10.45 ± 1.3            | 6.01 ± 1.2                   | 7.48 ± 1.2                  | 0.151           | 0.169           |
| virgin naive                                                            | 13.42 ± 1.5             | 9.43 ± 0.9             | 14.98 ± 4.3                  | 12.92 ± 1.4                 | 0.577           | 0.586           |

virgin naïve: CD27<sup>+</sup>CD38<sup>–</sup>; activated naïve: CD27<sup>+</sup>CD38<sup>+</sup>; transitionals: CD27<sup>+</sup>CD38<sup>bright</sup>; late memory: CD27<sup>+</sup>CD38<sup>–</sup>; early memory: CD27<sup>+</sup>CD38<sup>dim</sup>,  
 plasmablasts: CD27<sup>+</sup>CD38<sup>very bright</sup>.

**Table S6.** Serum Antibodies.

|                         | healthy controls (n=19) | incubation phase (n=7) | early acute infection (n=11) | late acute infection (n=15) | ANOVA             | ANCOVA          |
|-------------------------|-------------------------|------------------------|------------------------------|-----------------------------|-------------------|-----------------|
| Analyte                 | mean $\pm$ SEM          | mean $\pm$ SEM         | mean $\pm$ SEM               | mean $\pm$ SEM              | p-value           | p-value         |
| Anti-S1_IgM*            | 171.76 $\pm$ 131.5      | 131.46 $\pm$ 65.4      | 4735.23 $\pm$ 1193.8         | 5390.80 $\pm$ 962.2         | <b>1.5269E-07</b> | <b>1.53E-07</b> |
| Anti-S1_IgG*            | 18.17 $\pm$ 2.1         | 19.89 $\pm$ 2.5        | 6100.32 $\pm$ 2078.9         | 9863.68 $\pm$ 1569.5        | <b>2.9686E-07</b> | <b>7.23E-09</b> |
| Anti-S2_IgM*            | 443.58 $\pm$ 167.7      | 316.86 $\pm$ 96.9      | 3979.75 $\pm$ 898.7          | 4161.82 $\pm$ 726.6         | <b>2.0E-06</b>    | <b>3.93E-07</b> |
| Anti-S2_IgG*            | 1541.97 $\pm$ 539.1     | 1227.86 $\pm$ 406.5    | 15312.57 $\pm$ 1667.5        | 19179.20 $\pm$ 1569.7       | <b>3.3328E-16</b> | <b>1.37E-16</b> |
| Anti-RBD_IgM*           | 1383.63 $\pm$ 453.2     | 1190.46 $\pm$ 435.7    | 8381.55 $\pm$ 1496.8         | 8646.05 $\pm$ 1089.8        | <b>3.3099E-08</b> | <b>2.59E-09</b> |
| Anti-RBD_IgG*           | 134.55 $\pm$ 19.9       | 180.11 $\pm$ 42.3      | 9625.34 $\pm$ 2391.9         | 14700.11 $\pm$ 1288.4       | <b>3.2145E-12</b> | <b>2.68E-13</b> |
| Anti-N_IgM*             | 417.88 $\pm$ 153.4      | 238.11 $\pm$ 40.0      | 7109.66 $\pm$ 1438.3         | 4292.18 $\pm$ 964.4         | <b>7.4512E-07</b> | <b>5.32E-07</b> |
| Anti-N_IgG*             | 289.08 $\pm$ 36.8       | 503.86 $\pm$ 149.2     | 12357.75 $\pm$ 1567.5        | 14931.00 $\pm$ 1386.9       | <b>7.3522E-16</b> | <b>1.65E-14</b> |
| Anti-S_IgA <sup>#</sup> | 0.34 $\pm$ 0.0          | 0.38 $\pm$ 0.0         | 4.72 $\pm$ 1.1               | 6.64 $\pm$ 0.7              | <b>2.5591E-10</b> | <b>1.24E-10</b> |

\*[MFI]; <sup>#</sup>[A<sub>450</sub>].

**Table S7.** Percentages of Monocyte Subpopulations.

|                                          | healthy controls (n=19) | incubation phase (n=7) | early acute infection (n=11) | late acute infection (n=15) | ANOVA          | ANCOVA       |
|------------------------------------------|-------------------------|------------------------|------------------------------|-----------------------------|----------------|--------------|
| among gated monocytes                    | mean $\pm$ SEM          | mean $\pm$ SEM         | mean $\pm$ SEM               | mean $\pm$ SEM              | p-value        | p-value      |
| CD14 <sup>+</sup> CD16 <sup>-</sup>      | 0.43 $\pm$ 0.1          | 2.31 $\pm$ 1.0         | 3.11 $\pm$ 1.7               | 2.19 $\pm$ 1.2              | 0.254          | 0.251        |
| CD14 <sup>+</sup> CD16 <sup>+</sup>      | 70.69 $\pm$ 2.7         | 67.06 $\pm$ 3.1        | 68.95 $\pm$ 3.6              | 73.35 $\pm$ 2.7             | 0.596          | 0.805        |
| CD14 <sup>dim</sup> CD16 <sup>-</sup>    | 13.04 $\pm$ 1.5         | 9.56 $\pm$ 1.5         | 11.24 $\pm$ 2.1              | 12.24 $\pm$ 1.6             | 0.616          | 0.626        |
| CD14 <sup>+</sup> CD16 <sup>bright</sup> | 11.12 $\pm$ 1.0         | 15.29 $\pm$ 2.5        | 9.91 $\pm$ 1.5               | 7.19 $\pm$ 1.0              | <b>4.0E-03</b> | <b>0.026</b> |



**Table S8.** Percentages of Granulocyte Subpopulations.

|                                       | healthy controls (n=19) | incubation phase (n=7) | early acute infection (n=11) | late acute infection (n=15) | ANOVA       | ANCOVA       |
|---------------------------------------|-------------------------|------------------------|------------------------------|-----------------------------|-------------|--------------|
| among gated<br>granulocytes [%]       | mean $\pm$ SEM          | mean $\pm$ SEM         | mean $\pm$ SEM               | mean $\pm$ SEM              | p-value     | p-value      |
| CD177-CD11b <sup>+</sup>              | 19.35 $\pm$ 4.0         | 16.32 $\pm$ 4.2        | 16.24 $\pm$ 4.5              | 13.55 $\pm$ 2.2             | 0.696       | 0.18         |
| CD177 <sup>+</sup> CD11b <sup>+</sup> | 32.56 $\pm$ 4.9         | 29.77 $\pm$ 8.2        | 33.64 $\pm$ 9.0              | 35.03 $\pm$ 6.2             | 0.97        | 0.691        |
| CD177 <sup>+</sup> CD11b <sup>-</sup> | 28.33 $\pm$ 5.1         | 32.27 $\pm$ 8.1        | 28.15 $\pm$ 5.6              | 29.35 $\pm$ 3.5             | 0.969       | 0.969        |
| CD177-CD11b <sup>-</sup>              | 19.77 $\pm$ 3.7         | 21.66 $\pm$ 5.8        | 21.96 $\pm$ 4.8              | 22.08 $\pm$ 4.9             | 0.976       | 0.987        |
| CD177-CD16 <sup>+</sup>               | 36.57 $\pm$ 5.5         | 31.93 $\pm$ 7.9        | 34.65 $\pm$ 8.0              | 26.76 $\pm$ 5.2             | 0.664       | 0.536        |
| CD177 <sup>+</sup> CD16 <sup>+</sup>  | 60.01 $\pm$ 5.3         | 63.46 $\pm$ 9.1        | 63.35 $\pm$ 8.0              | 65.68 $\pm$ 5.8             | 0.938       | 0.558        |
| CD177 <sup>+</sup> CD16 <sup>-</sup>  | 0.04 $\pm$ 0.0          | 0.17 $\pm$ 0.1         | 0.29 $\pm$ 0.1               | 0.45 $\pm$ 0.1              | <b>0.02</b> | <b>0.012</b> |
| CD177-CD16 <sup>-</sup>               | 2.98 $\pm$ 1.5          | 4.43 $\pm$ 3.7         | 1.72 $\pm$ 0.6               | 7.12 $\pm$ 4.6              | 0.42        | 0.782        |

**Table S9.** Percentages of CD8<sup>+</sup> T Cell Subpopulations.

|                                      | healthy controls (n=19) |   |     | incubation phase (n=7) |   |     | early acute infection (n=11) |   |     | late acute infection (n=15) |   |     | ANOVA           | ANCOVA          |
|--------------------------------------|-------------------------|---|-----|------------------------|---|-----|------------------------------|---|-----|-----------------------------|---|-----|-----------------|-----------------|
| among CD8 <sup>+</sup> [%]           | mean                    | ± | SEM | mean                   | ± | SEM | mean                         | ± | SEM | mean                        | ± | SEM | p-value         | p-value         |
| PD-1-CD27 <sup>+</sup>               | 58.14                   | ± | 6.1 | 55.16                  | ± | 8.1 | 47.13                        | ± | 7.2 | 66.63                       | ± | 5.4 | 0.237           | 0.799           |
| PD-1 <sup>+</sup> CD27 <sup>+</sup>  | 3.97                    | ± | 1.8 | 1.29                   | ± | 0.5 | 13.19                        | ± | 3.6 | 7.84                        | ± | 3.2 | <b>0.049</b>    | <b>0.048</b>    |
| PD-1 <sup>+</sup> CD27 <sup>-</sup>  | 3.87                    | ± | 1.8 | 0.86                   | ± | 0.6 | 14.51                        | ± | 4.7 | 5.02                        | ± | 2.4 | <b>0.021</b>    | <b>0.031</b>    |
| PD-1-CD27 <sup>-</sup>               | 34.02                   | ± | 5.7 | 42.70                  | ± | 8.5 | 25.17                        | ± | 6.7 | 20.52                       | ± | 3.8 | 0.101           | 0.23            |
| PD-1 <sup>+</sup>                    | 7.84                    | ± | 3.5 | 2.14                   | ± | 0.8 | 27.70                        | ± | 7.6 | 12.86                       | ± | 5.6 | <b>0.023</b>    | <b>0.027</b>    |
| CD127-CD27 <sup>+</sup>              | 11.81                   | ± | 1.6 | 12.07                  | ± | 2.4 | 14.17                        | ± | 3.6 | 21.37                       | ± | 2.4 | 0.178           | <b>0.003</b>    |
| CD127 <sup>+</sup> CD27 <sup>+</sup> | 51.54                   | ± | 5.6 | 46.51                  | ± | 8.4 | 48.34                        | ± | 6.5 | 54.48                       | ± | 3.8 | 0.645           | 0.816           |
| CD127 <sup>+</sup> CD27 <sup>-</sup> | 12.91                   | ± | 2.6 | 11.86                  | ± | 3.3 | 11.43                        | ± | 2.3 | 5.55                        | ± | 1.4 | 0.207           | 0.598           |
| CD127-CD27 <sup>-</sup>              | 23.75                   | ± | 4.9 | 29.55                  | ± | 7.8 | 26.06                        | ± | 6.7 | 18.60                       | ± | 3.6 | 0.491           | 0.941           |
| CD38-CD27 <sup>+</sup>               | 56.32                   | ± | 4.7 | 47.11                  | ± | 8.0 | 45.28                        | ± | 3.9 | 54.90                       | ± | 3.7 | 0.315           | 0.14            |
| CD38 <sup>+</sup> CD27 <sup>+</sup>  | 7.23                    | ± | 1.2 | 11.63                  | ± | 1.8 | 15.15                        | ± | 3.5 | 21.08                       | ± | 3.4 | <b>1.39E-03</b> | <b>0.002</b>    |
| CD38 <sup>+</sup> CD27 <sup>-</sup>  | 6.35                    | ± | 1.3 | 26.41                  | ± | 6.5 | 14.09                        | ± | 1.3 | 5.44                        | ± | 0.8 | <b>2.73E-07</b> | <b>6.31E-07</b> |
| CD38-CD27 <sup>-</sup>               | 30.10                   | ± | 4.8 | 14.88                  | ± | 4.2 | 25.49                        | ± | 6.0 | 18.58                       | ± | 3.2 | 0.138           | 0.211           |

**Table S10.** Expression of CD38 among CD8<sup>+</sup> T Cell Subpopulations.

|                                       | healthy controls (n=19) | incubation phase (n=7) | early acute infection (n=11) | late acute infection (n=15) | ANOVA           | ANCOVA         |
|---------------------------------------|-------------------------|------------------------|------------------------------|-----------------------------|-----------------|----------------|
| CD38 Expression [MFI]                 | mean ± SEM              | mean ± SEM             | mean ± SEM                   | mean ± SEM                  | p-value         | p-value        |
| CD8 <sup>+</sup>                      | 2038.3 ± 150.5          | 4304.9 ± 697.8         | 3739.0 ± 467.9               | 3847.7 ± 398.5              | <b>1.72E-04</b> | <b>5.5E-05</b> |
| CD38 <sup>+</sup> CD27 <sup>-</sup>   | 11940.0 ± 540.8         | 16399.7 ± 1172.6       | 21154.0 ± 6389.5             | 14559.1 ± 1684.6            | 0.150           | 0.187          |
| CD27 <sup>+</sup> CD45RA <sup>+</sup> | 17.13 ± 4.8             | 19.34 ± 6.0            | 18.37 ± 3.6                  | 33.05 ± 4.1                 | 0.052           | 0.674          |
| CD27 <sup>+</sup> CD45RA <sup>-</sup> | 17.00 ± 2.4             | 12.77 ± 2.3            | 12.33 ± 2.2                  | 10.38 ± 1.5                 | 0.131           | 0.216          |
| CD27 <sup>-</sup> CD45RA <sup>-</sup> | 5.99 ± 1.2              | 5.28 ± 1.6             | 2.96 ± 0.4                   | 2.26 ± 0.3                  | <b>0.016</b>    | <b>0.043</b>   |
| CD27 <sup>-</sup> CD45RA <sup>+</sup> | 29.74 ± 5.5             | 35.77 ± 7.8            | 35.02 ± 6.1                  | 22.24 ± 3.6                 | 0.342           | 0.915          |
| CD25 <sup>-</sup> CD127 <sup>+</sup>  | 54.58 ± 4.9             | 46.59 ± 6.3            | 45.05 ± 5.2                  | 54.20 ± 4.1                 | 0.679           | 0.293          |
| CD25 <sup>+</sup> CD127 <sup>+</sup>  | 7.42 ± 0.8              | 8.06 ± 1.5             | 13.87 ± 6.2                  | 6.92 ± 2.1                  | 0.546           | 0.665          |
| CD25 <sup>+</sup> CD127 <sup>-</sup>  | 0.88 ± 0.2              | 2.49 ± 0.4             | 2.49 ± 0.4                   | 2.28 ± 0.4                  | 0.115           | 0.066          |
| CD25 <sup>-</sup> CD127 <sup>-</sup>  | 37.11 ± 5.0             | 42.87 ± 7.5            | 38.59 ± 6.6                  | 36.61 ± 4.0                 | 0.908           | 0.35           |

**Table S11.** Percentages of CD4<sup>+</sup> T Cell Subpopulations.

|  | healthy controls (n=19) | incubation phase (n=7) | early acute infection (n=11) | late acute infection (n=15) | ANOVA | ANCOVA |
|--|-------------------------|------------------------|------------------------------|-----------------------------|-------|--------|
|--|-------------------------|------------------------|------------------------------|-----------------------------|-------|--------|

## Supplementary Material

|                                                        | mean ± SEM   | mean ± SEM   | mean ± SEM   | mean ± SEM   | p-value      | p-value      |
|--------------------------------------------------------|--------------|--------------|--------------|--------------|--------------|--------------|
| among<br>CD4 <sup>+</sup> CD45RA <sup>+</sup> [%]      |              |              |              |              |              |              |
| CD27-CD127 <sup>+</sup>                                | 9.08 ± 2.49  | 4.55 ± 1.95  | 7.12 ± 3.98  | 6.10 ± 2.40  | 0.746        | 0.765        |
| CD27 <sup>+</sup> CD127 <sup>+</sup>                   | 72.56 ± 4.13 | 74.00 ± 4.02 | 78.70 ± 7.05 | 74.60 ± 3.49 | 0.83         | 0.72         |
| CD27 <sup>+</sup> CD127 <sup>+</sup> CD38 <sup>+</sup> | 78.99 ± 3.26 | 78.86 ± 2.12 | 80.63 ± 2.25 | 78.69 ± 2.61 | 0.972        | 0.77         |
| CD27 <sup>+</sup> CD127 <sup>+</sup> CD38 <sup>-</sup> | 20.95 ± 3.24 | 21.10 ± 2.11 | 19.33 ± 2.25 | 21.26 ± 2.61 | 0.972        | 0.77         |
| CD27 <sup>+</sup> CD127 <sup>-</sup>                   | 11.09 ± 1.43 | 17.47 ± 2.94 | 9.23 ± 1.70  | 16.13 ± 1.73 | <b>0.012</b> | <b>0.042</b> |
| CD27-CD127 <sup>-</sup>                                | 7.27 ± 2.30  | 3.96 ± 1.31  | 4.93 ± 3.38  | 3.18 ± 1.76  | 0.586        | 0.732        |
| among<br>CD4 <sup>+</sup> CD45RA <sup>-</sup> [%]      |              |              |              |              |              |              |
| CD27-CD127 <sup>+</sup>                                | 16.92 ± 2.18 | 13.89 ± 4.24 | 10.71 ± 1.54 | 11.08 ± 0.83 | 0.091        | 0.114        |
| CD27 <sup>+</sup> CD127 <sup>+</sup>                   | 63.43 ± 2.02 | 63.89 ± 5.84 | 72.18 ± 3.52 | 66.45 ± 1.63 | 0.135        | 0.125        |
| CD27 <sup>+</sup> CD127 <sup>-</sup>                   | 15.18 ± 1.29 | 18.43 ± 2.48 | 14.89 ± 2.13 | 20.29 ± 1.32 | 0.054        | 0.147        |
| CD27-CD127 <sup>-</sup>                                | 4.48 ± 1.01  | 3.77 ± 2.06  | 2.22 ± 0.76  | 2.20 ± 0.50  | 0.238        | 0.183        |
| CD27 <sup>+</sup> CD38 <sup>-</sup>                    | 69.86 ± 2.2  | 71.49 ± 5.6  | 73.38 ± 1.8  | 66.05 ± 2.5  | 0.288        | 0.057        |
| CD27-CD38 <sup>-</sup>                                 | 19.47 ± 2.5  | 14.52 ± 5.0  | 11.31 ± 1.9  | 11.38 ± 0.9  | <b>0.035</b> | 0.059        |
| CD25 <sup>+</sup> CD127 <sup>-</sup> Tregs             | 8.95 ± 0.6   | 11.43 ± 0.8  | 9.47 ± 1.2   | 9.76 ± 0.5   | 0.257        | 0.242        |

**Table S12.** Percentages of NK Cell Subpopulations.

healthy controls (n=19)   incubation phase (n=7)   early acute infection (n=11)   late acute infection (n=15)   ANOVA   ANCOVA

| among                              | mean ± SEM |       | p-value | p-value |
|------------------------------------|------------|-------|------------|-------|------------|-------|------------|-------|---------|---------|
| gated lymphocytes [%]              |            |       |            |       |            |       |            |       |         |         |
| CD56 <sup>+</sup> CD3 <sup>+</sup> | 59.36      | ± 1.9 | 49.24      | ± 3.9 | 48.88      | ± 3.9 | 53.57      | ± 2.6 | 0.031   | 0.014   |
| CD56 <sup>+</sup> CD3 <sup>+</sup> | 5.88       | ± 1.1 | 3.97       | ± 1.7 | 5.01       | ± 2.1 | 5.79       | ± 1.5 | 0.865   | 0.89    |
| CD56 <sup>+</sup> CD3 <sup>-</sup> | 10.31      | ± 1.1 | 13.61      | ± 2.6 | 10.60      | ± 1.1 | 9.22       | ± 0.9 | 0.215   | 0.38    |

**Table S13.** Serum Cytokines.

|                   | healthy controls (n=19) | incubation phase (n=7) | early acute infection (n=11) | late acute infection (n=15) | ANOVA           | ANCOVA          |
|-------------------|-------------------------|------------------------|------------------------------|-----------------------------|-----------------|-----------------|
| Analyte [pg/ml]   | mean ± SEM              | mean ± SEM             | mean ± SEM                   | mean ± SEM                  | p-value         | p-value         |
| IL-1 $\beta$      | 18.18 ± 15.6            | 2.09 ± 0.0             | 99.14 ± 49.7                 | 33.23 ± 20.3                | 0.112           | 0.109           |
| IL-6              | 9.81 ± 7.5              | 21.20 ± 11.7           | 102.84 ± 48.6                | 47.02 ± 25.8                | 0.079           | 0.045           |
| TNF $\alpha$      | 12.76 ± 11.1            | 1.44 ± 0.0             | 30.46 ± 18.1                 | 19.43 ± 10.6                | 0.591           | 0.566           |
| IP-10             | 91.13 ± 14.8            | 402.04 ± 104.2         | 423.90 ± 75.4                | 157.12 ± 74.8               | <b>3.97E-04</b> | <b>6.12E-04</b> |
| IFN $\lambda$ 1   | 8.67 ± 2.1              | 5.82 ± 1.0             | 19.93 ± 8.6                  | 13.52 ± 3.8                 | 0.224           | 0.239           |
| IL-8              | 5.66 ± 2.5              | 12.15 ± 5.5            | 42.84 ± 20.4                 | 12.12 ± 6.5                 | 0.048           | 0.05            |
| IL-12p70          | 2.15 ± 1.4              | 0.67 ± 0.0             | 21.23 ± 12.1                 | 6.47 ± 4.4                  | 0.092           | 0.05            |
| IFN $\alpha$ 2    | 8.34 ± 5.4              | 12.01 ± 4.9            | 75.63 ± 43.8                 | 28.07 ± 16.9                | 0.137           | 0.074           |
| IFN $\lambda$ 2/3 | 55.07 ± 28.8            | 11.13 ± 0.0            | 79.37 ± 44.1                 | 110.40 ± 57.2               | 0.54            | 0.367           |
| GM-CSF            | 5.12 ± 4.0              | 1.14 ± 0.0             | 134.71 ± 82.9                | 32.68 ± 26.2                | 0.084           | <b>0.046</b>    |
| IFN $\beta$       | 4.41 ± 0.0              | 5.66 ± 1.2             | 129.01 ± 84.3                | 37.34 ± 32.9                | 0.143           | 0.057           |
| IL-10             | 3.98 ± 1.9              | 3.45 ± 1.2             | 45.92 ± 23.9                 | 13.37 ± 7.1                 | 0.042           | 0.032           |
| IFN $\gamma$      | 18.41 ± 17.1            | 11.93 ± 7.0            | 70.25 ± 40.3                 | 27.50 ± 20.7                | 0.409           | 0.466           |

**Table S14.** Absolute Numbers of Live Leukocytes.

|                     | healthy controls (n=19) | incubation phase (n=7) | early acute infection (n=11) | late acute infection (n=15) | ANOVA           | ANCOVA          |
|---------------------|-------------------------|------------------------|------------------------------|-----------------------------|-----------------|-----------------|
| cell count/ $\mu$ L | mean $\pm$ SEM          | mean $\pm$ SEM         | mean $\pm$ SEM               | mean $\pm$ SEM              | p-value         | p-value         |
| granulocytes        | 2241 $\pm$ 279          | 2025 $\pm$ 504         | 2256 $\pm$ 377               | 2739 $\pm$ 709              | 0.799           | 0.407           |
| lymphocytes         | 1788 $\pm$ 137          | 1275 $\pm$ 145         | 943 $\pm$ 116                | 1493 $\pm$ 128              | <b>6.3E-04</b>  | <b>9.4E-04</b>  |
| CD3                 | 1195 $\pm$ 97           | 740 $\pm$ 87           | 543 $\pm$ 82                 | 919 $\pm$ 88                | <b>1.02E-04</b> | <b>1.04E-04</b> |
| CD8                 | 357 $\pm$ 43            | 223 $\pm$ 42           | 132 $\pm$ 39                 | 293 $\pm$ 46                | <b>6.4E-03</b>  | <b>9.8E-03</b>  |
| CD4                 | 693 $\pm$ 47            | 418 $\pm$ 46           | 344 $\pm$ 53                 | 531 $\pm$ 52                | <b>8.3E-05</b>  | <b>3.7E-05</b>  |
| CD19                | 302 $\pm$ 61            | 103 $\pm$ 25           | 160 $\pm$ 28                 | 205 $\pm$ 35                | 0.066           | 0.074           |
| CD56                | 205 $\pm$ 25            | 159 $\pm$ 39           | 106 $\pm$ 18                 | 136 $\pm$ 17                | <b>0.030</b>    | <b>0.038</b>    |
| monocytes           | 388 $\pm$ 29            | 361 $\pm$ 36           | 414 $\pm$ 78                 | 368 $\pm$ 60                | 0.923           | 0.859           |

**Table S15.** Apoptotic among Live Leukocytes.

|              | healthy controls (n=19) | incubation phase (n=7) | early acute infection (n=11) | late acute infection (n=15) | ANOVA   | ANCOVA  |
|--------------|-------------------------|------------------------|------------------------------|-----------------------------|---------|---------|
| [%]          | mean $\pm$ SEM          | mean $\pm$ SEM         | mean $\pm$ SEM               | mean $\pm$ SEM              | p-value | p-value |
| granulocytes | 3.14 $\pm$ 2.56         | 22.93 $\pm$ 22.71      | 2.51 $\pm$ 1.72              | 5.21 $\pm$ 3.66             | 0.266   | 0.217   |
| lymphocytes  | 0.57 $\pm$ 0.30         | 0.11 $\pm$ 0.03        | 3.48 $\pm$ 2.12              | 0.48 $\pm$ 0.18             | 0.078   | 0.117   |
| CD3          | 0.75 $\pm$ 0.41         | 0.14 $\pm$ 0.05        | 5.33 $\pm$ 3.02              | 0.81 $\pm$ 0.36             | 0.05    | 0.076   |
| CD8          | 0.11 $\pm$ 0.05         | 0.03 $\pm$ 0.01        | 2.90 $\pm$ 2.25              | 0.51 $\pm$ 0.30             | 0.17    | 0.219   |
| CD4          | 0.06 $\pm$ 0.02         | 0.02 $\pm$ 0.01        | 1.65 $\pm$ 1.45              | 0.25 $\pm$ 0.16             | 0.252   | 0.314   |
| CD19         | 4.19 $\pm$ 3.62         | 0.22 $\pm$ 0.08        | 5.96 $\pm$ 4.33              | 0.91 $\pm$ 0.46             | 0.625   | 0.744   |
| CD56         | 0.22 $\pm$ 0.06         | 0.08 $\pm$ 0.01        | 2.12 $\pm$ 1.60              | 0.21 $\pm$ 0.06             | 0.153   | 0.221   |
| monocytes    | 0.45 $\pm$ 0.11         | 0.32 $\pm$ 0.14        | 6.83 $\pm$ 5.66              | 0.75 $\pm$ 0.34             | 0.214   | 0.228   |



**Table S16.** Correlations among Humoral and Cellular Immune Parameters in Healthy Controls.

|                                                       | monocytes<br>CD14 <sup>+</sup> CD16 <sup>bright</sup> | granulocytes<br>CD177 <sup>+</sup> CD16 <sup>-</sup> | serum conc.<br>IP-10 | plasmablasts | anti-S1 IgM | anti-S1 IgG | anti-S1 IgA | cytotoxic T<br>CD38 <sup>+</sup> CD27 <sup>-</sup> | cytotoxic T<br>PD-1 <sup>+</sup> | mfi CD38 on<br>cytotoxic T |
|-------------------------------------------------------|-------------------------------------------------------|------------------------------------------------------|----------------------|--------------|-------------|-------------|-------------|----------------------------------------------------|----------------------------------|----------------------------|
| monocytes<br>CD14 <sup>+</sup> CD16 <sup>bright</sup> | 1                                                     |                                                      |                      |              |             |             |             |                                                    |                                  |                            |
| granulocytes<br>CD177 <sup>+</sup> CD16 <sup>-</sup>  |                                                       | 1                                                    |                      |              |             |             |             |                                                    |                                  |                            |
| IP-10<br>serum conc.                                  | $r = 0.746$<br>$p = 0.001$                            |                                                      | 1                    |              |             |             |             |                                                    |                                  |                            |
| plasmablasts                                          |                                                       |                                                      |                      | 1            |             |             |             |                                                    |                                  |                            |
| anti-S1 IgM                                           |                                                       |                                                      |                      |              | 1           |             |             |                                                    |                                  |                            |
| anti-S1 IgG                                           |                                                       |                                                      |                      |              |             | 1           |             |                                                    |                                  |                            |
| anti-S1 IgA                                           |                                                       |                                                      |                      |              |             |             | 1           |                                                    |                                  |                            |
| cytotoxic T<br>CD38 <sup>+</sup> CD27 <sup>-</sup>    |                                                       |                                                      |                      |              |             |             |             | 1                                                  |                                  |                            |
| cytotoxic T cells<br>PD-1 <sup>+</sup>                |                                                       |                                                      |                      |              |             |             |             |                                                    | 1                                |                            |
| MFI CD38 on<br>cytotoxic T cells                      |                                                       |                                                      |                      |              |             |             |             |                                                    |                                  | 1                          |

Spearman rank correlation analysis. The table only contains results that withstand Bonferroni correction.

**Table S17.** Correlations among Humoral and Cellular Immune Parameters in COVID-19 Patients.

|                                                           | monocytes<br>CD14 <sup>+</sup> CD16 <sup>bright</sup> | granulocytes<br>CD177 <sup>+</sup> CD16 <sup>-</sup> | serum conc.<br>IP-10 | plasmablasts | anti-S1 IgM         | anti-S1 IgG         | anti-S1 IgA | cytotoxic T<br>CD38 <sup>+</sup> CD27 <sup>-</sup> | cytotoxic T<br>PD-1 <sup>+</sup> | mfi CD38 on<br>cytotoxic T |
|-----------------------------------------------------------|-------------------------------------------------------|------------------------------------------------------|----------------------|--------------|---------------------|---------------------|-------------|----------------------------------------------------|----------------------------------|----------------------------|
| monocytes<br>CD14 <sup>+</sup> CD16 <sup>bright</sup>     | 1                                                     |                                                      |                      |              |                     |                     |             |                                                    |                                  |                            |
| granulocytes<br>CD177 <sup>+</sup> CD16 <sup>-</sup>      |                                                       | 1                                                    |                      |              |                     |                     |             |                                                    |                                  |                            |
| IP-10                                                     |                                                       |                                                      | 1                    |              |                     |                     |             |                                                    |                                  |                            |
| serum conc.                                               |                                                       |                                                      |                      | 1            |                     |                     |             |                                                    |                                  |                            |
| plasmablasts                                              |                                                       |                                                      |                      |              | 1                   |                     |             |                                                    |                                  |                            |
| anti-S1 IgM                                               |                                                       | r=0.594<br>p<0.0001                                  |                      |              |                     |                     |             |                                                    |                                  |                            |
| anti-S1 IgG                                               |                                                       | r=0.594<br>p<0.0001                                  |                      |              | r=0.810<br>p<0.0001 | 1                   |             |                                                    |                                  |                            |
| anti-S1 IgA                                               |                                                       | r=0.609<br>p<0.0001                                  |                      |              | r=0.882<br>p<0.0001 | r=0.926<br>p<0.0001 | 1           |                                                    |                                  |                            |
| cytotoxic T cells<br>CD38 <sup>+</sup> /CD27 <sup>-</sup> |                                                       |                                                      | r=0.667<br>p<0.0001  |              |                     |                     |             | 1                                                  |                                  |                            |
| cytotoxic T cells<br>PD-1 <sup>+</sup>                    |                                                       |                                                      |                      |              |                     |                     |             |                                                    | 1                                |                            |
| MFI CD38 on<br>cytotoxic T cells                          |                                                       |                                                      |                      |              |                     |                     |             |                                                    |                                  | 1                          |
